# Supplementary material
Source: PubMed Central journal article supplement (PMC6544141)
Supplement: NIHMS1024578-supplement-Supplemental.pdf [file NIHMS1024578-supplement-Supplemental.pdf]

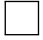

## APPENDIX

### A ESTIMATION UNDER GENERALIZED LINEAR MODELS

Here we consider extending the CoFu method to the generalized linear models (GLMs). Consider  $K$  independent datasets. In dataset  $k(= 1, \dots, K)$ , denote  $\mathbf{y}^k$  as the response variable, and  $\mathbf{X}^k$  as the length- $p$  vector of covariates. There are  $n_k$  i.i.d observations in dataset  $k$ . The response variable  $\mathbf{y}^k$  is generated from a distribution in the exponential family with mean  $\boldsymbol{\mu}^k \equiv E(\mathbf{y}^k)$  dependent on  $\mathbf{X}^k$  via

$$g(\boldsymbol{\mu}^k) = \mathbf{X}^k \boldsymbol{\beta}^k,$$

where  $g(\cdot)$  is the link function. In the Logit model, a representative of GLM,  $g(\mu) = \log \frac{\mu}{1-\mu}$ .

The CoFu estimator  $\{\hat{\boldsymbol{\beta}}^k : k = 1, \dots, K\}$  is defined as the minimizer of

$$-\sum_{k=1}^K \frac{1}{n_k} L_k(\boldsymbol{\beta}^k) + \lambda_1 \sum_{k=1}^K \|\boldsymbol{\beta}^k\|_1 + \lambda_2 \sum_{k=1}^{K-1} \sum_{l=1}^L \|\boldsymbol{\beta}_{(l)}^k - \boldsymbol{\beta}_{(l)}^{k+1}\|_2, \quad (\text{A1})$$

where  $L_k(\cdot)$  is the log-likelihood function of dataset  $k$ . In the Logit model,  $L_k(\boldsymbol{\beta}^k) = \sum_{i=1}^{n_k} y_i^k \mathbf{X}_i^k \boldsymbol{\beta}^k - \log[1 + \exp(\mathbf{X}_i^k \boldsymbol{\beta}^k)]$ .

We compute the minimizer of (A1) by using the ADMM algorithm:

$$\begin{aligned} \boldsymbol{\beta}(t+1) &= \underset{\boldsymbol{\beta}}{\operatorname{argmin}} \left[ -\sum_{k=1}^K \frac{1}{n_k} L_k(\boldsymbol{\beta}^k) + \frac{\sigma}{2} \left( \|\mathbf{A}\boldsymbol{\beta} - \boldsymbol{\eta}(t) + \mathbf{u}(t)/\sigma\|_2^2 + \|\boldsymbol{\beta} - \boldsymbol{\delta}(t) + \mathbf{v}(t)/\sigma\|_2^2 \right) \right], \\ \boldsymbol{\delta}(t+1) &= \operatorname{ST}_{\lambda_1/\sigma}[\boldsymbol{\beta}(t+1) + \mathbf{v}(t)/\sigma], \\ \boldsymbol{\eta}_{(l)}^k(t+1) &= \left( 1 - \frac{\lambda_2}{\sigma \|\boldsymbol{\beta}_{(l)}^k(t+1) - \boldsymbol{\beta}_{(l)}^{k+1}(t+1) + \mathbf{u}_{(l)}^k(t)/\sigma\|_2} \right)_+ \times [\boldsymbol{\beta}_{(l)}^k(t+1) - \boldsymbol{\beta}_{(l)}^{k+1}(t+1) + \mathbf{u}_{(l)}^k(t)/\sigma], \\ \mathbf{u}(t+1) &= \mathbf{u}(t) + \sigma[\mathbf{A}\boldsymbol{\beta}(t+1) - \boldsymbol{\eta}(t+1)], \\ \mathbf{v}(t+1) &= \mathbf{v}(t) + \sigma[\boldsymbol{\beta}(t+1) - \boldsymbol{\delta}(t+1)]. \end{aligned}$$

These update equations are highly similar to that in the linear regression model. The  $\boldsymbol{\beta}$  update involves solving a non-linear equation and can be efficiently realized with the L-BFGS algorithm<sup>35</sup>, a limited memory version of the BFGS algorithm.

### B ADDITIONAL TABLES AND FIGURES

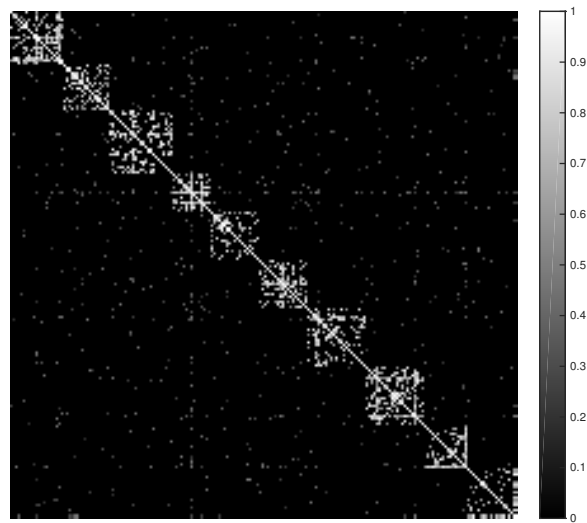

**FIGURE B1** Greyscale image of a structured correlation matrix. The lighter the color is, the stronger the correlation is.

**TABLE B1** Simulation under the LR model: mean(sd) of AUC for effect identification. Nonzero coefficients are randomly drawn from  $\mathcal{U}[0.2, 1]$ .

|                                              | $r = 100$    |              |              | $r = 150$    |              |              |
|----------------------------------------------|--------------|--------------|--------------|--------------|--------------|--------------|
|                                              | structured   | unstructured | independence | structured   | unstructured | independence |
| $(\rho_a, \rho_h, \rho_n) = (0.1, 0, 0.9)$   |              |              |              |              |              |              |
| P.Lasso                                      | 0.605(0.018) | 0.57(0.01)   | 0.612(0.017) | 0.578(0.016) | 0.576(0.02)  | 0.595(0.019) |
| S.Lasso                                      | 0.746(0.012) | 0.795(0.008) | 0.745(0.01)  | 0.677(0.015) | 0.75(0.011)  | 0.675(0.017) |
| CoFu                                         | 0.761(0.011) | 0.848(0.01)  | 0.757(0.012) | 0.695(0.013) | 0.746(0.015) | 0.688(0.012) |
| $(\rho_a, \rho_h, \rho_n) = (0.1, 0.9, 0)$   |              |              |              |              |              |              |
| P.Lasso                                      | 0.744(0.021) | 0.698(0.014) | 0.745(0.015) | 0.659(0.017) | 0.646(0.013) | 0.661(0.014) |
| S.Lasso                                      | 0.757(0.014) | 0.807(0.013) | 0.752(0.014) | 0.683(0.017) | 0.756(0.011) | 0.676(0.015) |
| CoFu                                         | 0.839(0.013) | 0.848(0.007) | 0.844(0.012) | 0.763(0.013) | 0.795(0.009) | 0.744(0.01)  |
| $(\rho_a, \rho_h, \rho_n) = (0.2, 0.6, 0.2)$ |              |              |              |              |              |              |
| P.Lasso                                      | 0.721(0.023) | 0.827(0.012) | 0.713(0.019) | 0.667(0.015) | 0.647(0.015) | 0.658(0.016) |
| S.Lasso                                      | 0.757(0.019) | 0.806(0.009) | 0.756(0.011) | 0.689(0.01)  | 0.763(0.017) | 0.677(0.013) |
| CoFu                                         | 0.824(0.015) | 0.882(0.008) | 0.82(0.013)  | 0.751(0.012) | 0.786(0.014) | 0.738(0.014) |
| $(\rho_a, \rho_h, \rho_n) = (0.4, 0.1, 0.5)$ |              |              |              |              |              |              |
| P.Lasso                                      | 0.723(0.01)  | 0.713(0.013) | 0.706(0.014) | 0.675(0.014) | 0.666(0.014) | 0.673(0.018) |
| S.Lasso                                      | 0.752(0.009) | 0.801(0.012) | 0.748(0.008) | 0.681(0.011) | 0.757(0.012) | 0.668(0.012) |
| CoFu                                         | 0.82(0.009)  | 0.843(0.011) | 0.804(0.014) | 0.74(0.014)  | 0.779(0.01)  | 0.733(0.013) |
| $(\rho_a, \rho_h, \rho_n) = (0.5, 0.5, 0)$   |              |              |              |              |              |              |
| P.Lasso                                      | 0.845(0.02)  | 0.827(0.012) | 0.838(0.018) | 0.787(0.019) | 0.777(0.015) | 0.781(0.021) |
| S.Lasso                                      | 0.76(0.015)  | 0.806(0.009) | 0.753(0.013) | 0.691(0.011) | 0.759(0.016) | 0.682(0.013) |
| CoFu                                         | 0.88(0.014)  | 0.882(0.008) | 0.876(0.01)  | 0.805(0.01)  | 0.825(0.012) | 0.806(0.008) |
| $(\rho_a, \rho_h, \rho_n) = (0.6, 0.2, 0.2)$ |              |              |              |              |              |              |
| P.Lasso                                      | 0.852(0.012) | 0.819(0.015) | 0.838(0.016) | 0.79(0.015)  | 0.765(0.021) | 0.788(0.017) |
| S.Lasso                                      | 0.755(0.013) | 0.803(0.011) | 0.753(0.011) | 0.684(0.022) | 0.755(0.014) | 0.677(0.018) |
| CoFu                                         | 0.883(0.012) | 0.877(0.009) | 0.866(0.01)  | 0.803(0.016) | 0.811(0.013) | 0.802(0.016) |
| $(\rho_a, \rho_h, \rho_n) = (0.9, 0, 0.1)$   |              |              |              |              |              |              |
| P.Lasso                                      | 0.955(0.015) | 0.889(0.014) | 0.954(0.014) | 0.886(0.016) | 0.853(0.017) | 0.895(0.014) |
| S.Lasso                                      | 0.748(0.016) | 0.795(0.012) | 0.741(0.009) | 0.696(0.016) | 0.747(0.013) | 0.687(0.016) |
| CoFu                                         | 0.967(0.013) | 0.93(0.01)   | 0.964(0.012) | 0.92(0.014)  | 0.887(0.011) | 0.92(0.012)  |

**TABLE B2** Simulation under the LR model: mean(sd) of AUC for community differentiation. Nonzero coefficients are randomly drawn from  $\mathcal{U}[0.2, 1]$ .

|                                              | $r = 100$    |              |              | $r = 150$    |              |              |
|----------------------------------------------|--------------|--------------|--------------|--------------|--------------|--------------|
|                                              | structured   | unstructured | independence | structured   | unstructured | independence |
| $(\rho_a, \rho_h, \rho_n) = (0.1, 0, 0.9)$   |              |              |              |              |              |              |
| S.Lasso                                      | 0.524(0.066) | 0.551(0.065) | 0.554(0.082) | 0.563(0.052) | 0.591(0.072) | 0.537(0.045) |
| CoFu                                         | 0.774(0.042) | 0.723(0.039) | 0.795(0.038) | 0.714(0.045) | 0.711(0.048) | 0.724(0.037) |
| $(\rho_a, \rho_h, \rho_n) = (0.1, 0.9, 0.1)$ |              |              |              |              |              |              |
| S.Lasso                                      | 0.626(0.062) | 0.53(0.075)  | 0.595(0.088) | 0.627(0.067) | 0.652(0.082) | 0.675(0.042) |
| CoFu                                         | 0.801(0.045) | 0.722(0.032) | 0.735(0.034) | 0.76(0.041)  | 0.781(0.035) | 0.724(0.052) |
| $(\rho_a, \rho_h, \rho_n) = (0.2, 0.6, 0.2)$ |              |              |              |              |              |              |
| S.Lasso                                      | 0.573(0.082) | 0.54(0.105)  | 0.549(0.074) | 0.477(0.06)  | 0.515(0.088) | 0.488(0.037) |
| CoFu                                         | 0.742(0.028) | 0.698(0.042) | 0.73(0.04)   | 0.711(0.035) | 0.734(0.031) | 0.711(0.033) |
| $(\rho_a, \rho_h, \rho_n) = (0.4, 0.1, 0.5)$ |              |              |              |              |              |              |
| S.Lasso                                      | 0.534(0.072) | 0.552(0.086) | 0.567(0.041) | 0.537(0.058) | 0.542(0.055) | 0.544(0.066) |
| CoFu                                         | 0.785(0.021) | 0.738(0.046) | 0.777(0.036) | 0.727(0.033) | 0.731(0.041) | 0.715(0.033) |
| $(\rho_a, \rho_h, \rho_n) = (0.5, 0.5, 0)$   |              |              |              |              |              |              |
| S.Lasso                                      | 0.542(0.057) | 0.487(0.059) | 0.546(0.061) | 0.515(0.088) | 0.492(0.124) | 0.513(0.084) |
| CoFu                                         | 0.812(0.037) | 0.754(0.023) | 0.81(0.036)  | 0.711(0.043) | 0.705(0.053) | 0.703(0.034) |
| $(\rho_a, \rho_h, \rho_n) = (0.6, 0.2, 0.2)$ |              |              |              |              |              |              |
| S.Lasso                                      | 0.5(0.074)   | 0.49(0.072)  | 0.539(0.103) | 0.47(0.075)  | 0.529(0.08)  | 0.504(0.068) |
| CoFu                                         | 0.791(0.046) | 0.742(0.029) | 0.802(0.046) | 0.723(0.049) | 0.721(0.036) | 0.713(0.055) |
| $(\rho_a, \rho_h, \rho_n) = (0.9, 0, 0.1)$   |              |              |              |              |              |              |
| S.Lasso                                      | 0.481(0.062) | 0.45(0.088)  | 0.453(0.092) | 0.52(0.072)  | 0.478(0.082) | 0.444(0.062) |
| CoFu                                         | 0.975(0.031) | 0.968(0.033) | 0.975(.034)  | 0.927(0.035) | 0.91(0.045)  | 0.911(0.031) |

**TABLE B3** Simulation under the LR model: mean(sd) of AUC for effect identification. Nonzero coefficients in dataset 2 are drawn from  $\mathcal{U}[0.4, 0.7]$ , and those specific to datasets 1 and 3 are drawn from  $\mathcal{U}[0.1, 0.3]$  and  $\mathcal{U}[0.8, 1]$ , respectively.

|                                              | $r = 100$    |              |              | $r = 150$    |              |              |
|----------------------------------------------|--------------|--------------|--------------|--------------|--------------|--------------|
|                                              | structured   | unstructured | independence | structured   | unstructured | independence |
| $(\rho_a, \rho_h, \rho_n) = (0.1, 0, 0.9)$   |              |              |              |              |              |              |
| P.Lasso                                      | 0.598(0.02)  | 0.549(0.022) | 0.591(0.012) | 0.559(0.02)  | 0.546(0.014) | 0.556(0.021) |
| S.Lasso                                      | 0.757(0.011) | 0.812(0.012) | 0.738(0.015) | 0.675(0.021) | 0.757(0.011) | 0.666(0.015) |
| CoFu                                         | 0.759(0.012) | 0.805(0.009) | 0.744(0.012) | 0.677(0.018) | 0.734(0.012) | 0.661(0.018) |
| $(\rho_a, \rho_h, \rho_n) = (0.1, 0.9, 0)$   |              |              |              |              |              |              |
| P.Lasso                                      | 0.721(0.02)  | 0.684(0.022) | 0.744(0.012) | 0.675(0.016) | 0.621(0.012) | 0.667(0.015) |
| S.Lasso                                      | 0.768(0.013) | 0.832(0.012) | 0.761(0.015) | 0.689(0.018) | 0.755(0.012) | 0.68(0.014)  |
| CoFu                                         | 0.811(0.012) | 0.846(0.01)  | 0.813(0.013) | 0.761(0.016) | 0.786(0.01)  | 0.754(0.017) |
| $(\rho_a, \rho_h, \rho_n) = (0.2, 0.6, 0.2)$ |              |              |              |              |              |              |
| P.Lasso                                      | 0.724(0.023) | 0.678(0.017) | 0.726(0.009) | 0.66(0.022)  | 0.624(0.01)  | 0.662(0.022) |
| S.Lasso                                      | 0.761(0.01)  | 0.819(0.014) | 0.756(0.007) | 0.69(0.014)  | 0.764(0.013) | 0.681(0.012) |
| CoFu                                         | 0.823(0.015) | 0.853(0.011) | 0.82(0.012)  | 0.754(0.011) | 0.785(0.014) | 0.741(0.01)  |
| $(\rho_a, \rho_h, \rho_n) = (0.4, 0.1, 0.5)$ |              |              |              |              |              |              |
| P.Lasso                                      | 0.712(0.018) | 0.685(0.027) | 0.708(0.014) | 0.672(0.012) | 0.626(0.018) | 0.67(0.012)  |
| S.Lasso                                      | 0.751(0.012) | 0.806(0.009) | 0.731(0.022) | 0.681(0.013) | 0.758(0.009) | 0.673(0.013) |
| CoFu                                         | 0.809(0.013) | 0.847(0.007) | 0.804(0.014) | 0.815(0.02)  | 0.786(0.008) | 0.734(0.022) |
| $(\rho_a, \rho_h, \rho_n) = (0.5, 0.5, 0)$   |              |              |              |              |              |              |
| P.Lasso                                      | 0.868(0.016) | 0.845(0.012) | 0.868(0.013) | 0.799(0.021) | 0.766(0.021) | 0.796(0.019) |
| S.Lasso                                      | 0.769(0.014) | 0.82(0.006)  | 0.757(0.019) | 0.693(0.011) | 0.768(0.013) | 0.684(0.009) |
| CoFu                                         | 0.889(0.014) | 0.884(0.006) | 0.885(0.013) | 0.816(0.014) | 0.829(0.01)  | 0.809(0.016) |
| $(\rho_a, \rho_h, \rho_n) = (0.6, 0.2, 0.2)$ |              |              |              |              |              |              |
| P.Lasso                                      | 0.861(0.016) | 0.827(0.019) | 0.858(0.014) | 0.807(0.018) | 0.751(0.015) | 0.805(0.024) |
| S.Lasso                                      | 0.764(0.012) | 0.814(0.009) | 0.751(0.013) | 0.686(0.023) | 0.761(0.01)  | 0.677(0.018) |
| CoFu                                         | 0.878(0.008) | 0.877(0.007) | 0.872(0.01)  | 0.815(0.02)  | 0.817(0.011) | 0.813(0.02)  |
| $(\rho_a, \rho_h, \rho_n) = (0.9, 0, 0.1)$   |              |              |              |              |              |              |
| P.Lasso                                      | 0.878(0.02)  | 0.889(0.022) | 0.861(0.012) | 0.909(0.019) | 0.855(0.019) | 0.913(0.016) |
| S.Lasso                                      | 0.761(0.013) | 0.813(0.008) | 0.749(0.018) | 0.68(0.018)  | 0.75(0.012)  | 0.672(0.015) |
| CoFu                                         | 0.857(0.012) | 0.883(0.009) | 0.848(0.012) | 0.932(0.017) | 0.899(0.013) | 0.93(0.021)  |

**TABLE B4** Simulation under the LR model: mean(sd) of AUC for community differentiation. Nonzero coefficients in dataset 2 are drawn from  $\mathcal{U}[0.4, 0.7]$ , and those specific to datasets 1 and 3 are drawn from  $\mathcal{U}[0.1, 0.3]$  and  $\mathcal{U}[0.8, 1]$ , respectively.

|                                              | $r = 100$    |              |              | $r = 150$    |              |              |
|----------------------------------------------|--------------|--------------|--------------|--------------|--------------|--------------|
|                                              | structured   | unstructured | independence | structured   | unstructured | independence |
| $(\rho_a, \rho_h, \rho_n) = (0.1, 0, 0.9)$   |              |              |              |              |              |              |
| S.Lasso                                      | 0.598(0.066) | 0.609(0.086) | 0.553(0.062) | 0.578(0.068) | 0.515(0.082) | 0.462(0.088) |
| CoFu                                         | 0.793(0.036) | 0.782(0.052) | 0.787(0.042) | 0.824(0.038) | 0.84(0.038)  | 0.853(0.035) |
| $(\rho_a, \rho_h, \rho_n) = (0.1, 0.9, 0)$   |              |              |              |              |              |              |
| S.Lasso                                      | 0.449(0.055) | 0.441(0.082) | 0.489(0.056) | 0.658(0.061) | 0.629(0.082) | 0.6(0.058)   |
| CoFu                                         | 0.765(0.035) | 0.754(0.031) | 0.789(0.040) | 0.79(0.037)  | 0.737(0.042) | 0.733(0.035) |
| $(\rho_a, \rho_h, \rho_n) = (0.2, 0.6, 0.2)$ |              |              |              |              |              |              |
| S.Lasso                                      | 0.578(0.083) | 0.516(0.093) | 0.574(0.078) | 0.499(0.077) | 0.544(0.1)   | 0.506(0.094) |
| CoFu                                         | 0.733(0.042) | 0.713(0.057) | 0.734(0.037) | 0.711(0.035) | 0.734(0.031) | 0.711(0.033) |
| $(\rho_a, \rho_h, \rho_n) = (0.4, 0.1, 0.5)$ |              |              |              |              |              |              |
| S.Lasso                                      | 0.553(0.038) | 0.546(0.071) | 0.558(0.046) | 0.516(0.063) | 0.516(0.06)  | 0.541(0.061) |
| CoFu                                         | 0.755(0.041) | 0.754(0.044) | 0.753(0.027) | 0.724(0.034) | 0.719(0.047) | 0.695(0.029) |
| $(\rho_a, \rho_h, \rho_n) = (0.5, 0.5, 0)$   |              |              |              |              |              |              |
| S.Lasso                                      | 0.53(0.072)  | 0.48(0.063)  | 0.549(0.073) | 0.474(0.063) | 0.515(0.094) | 0.502(0.052) |
| CoFu                                         | 0.811(0.039) | 0.769(0.026) | 0.818(0.047) | 0.698(0.04)  | 0.692(0.059) | 0.701(0.028) |
| $(\rho_a, \rho_h, \rho_n) = (0.6, 0.2, 0.2)$ |              |              |              |              |              |              |
| S.Lasso                                      | 0.495(0.071) | 0.482(0.082) | 0.476(0.073) | 0.476(0.065) | 0.51(0.073)  | 0.504(0.075) |
| CoFu                                         | 0.787(0.037) | 0.762(0.031) | 0.747(0.031) | 0.724(0.029) | 0.702(0.054) | 0.721(0.038) |
| $(\rho_a, \rho_h, \rho_n) = (0.9, 0, 0.1)$   |              |              |              |              |              |              |
| S.Lasso                                      | 0.529(0.062) | 0.539(0.067) | 0.543(0.071) | 0.449(0.068) | 0.519(0.082) | 0.584(0.082) |
| CoFu                                         | 0.975(0.036) | 0.968(0.036) | 0.975(0.035) | 0.899(0.03)  | 0.908(0.042) | 0.908(0.035) |

**TABLE B5** Simulation under the LR model: summary statistics of results obtained by using V-fold (V=5) CV. Nonzero coefficients are equal to 0.5. In each cell, mean(sd).

|                                              | Individual effect |               | Community     |               | ERMSE         | PRMSE         |
|----------------------------------------------|-------------------|---------------|---------------|---------------|---------------|---------------|
|                                              | TPR               | FPR           | TPR           | FPR           |               |               |
| $(\rho_a, \rho_h, \rho_n) = (0.1, 0, 0.9)$   |                   |               |               |               |               |               |
| P.Lasso                                      | 0.176 (0.054)     | 0.05 (0.025)  | 1 (0)         | 1 (0)         | 0.154 (0.003) | 4.181 (0.414) |
| S.Lasso                                      | 0.238 (0.07)      | 0.041 (0.015) | 0.179 (0.118) | 0.022 (0.032) | 0.151 (0.002) | 3.335 (0.533) |
| CoFu                                         | 0.625 (0.033)     | 0.21 (0.026)  | 0.579 (0.158) | 0.072 (0.059) | 0.144 (0.001) | 0.838 (0.109) |
| $(\rho_a, \rho_h, \rho_n) = (0.1, 0.9, 0)$   |                   |               |               |               |               |               |
| P.Lasso                                      | 0.449(0.06)       | 0.081(0.018)  | 1 (0)         | 1 (0)         | 0.132 (0.002) | 2.937(0.167)  |
| S.Lasso                                      | 0.291(0.074)      | 0.036(0.013)  | 0.23(0.157)   | 0.065(0.09)   | 0.135(0.003)  | 2.88 (0.463)  |
| CoFu                                         | 0.732(0.024)      | 0.211(0.017)  | 0.67(0.106)   | 0.205(0.037)  | 0.122(0.003)  | 0.685(0.047)  |
| $(\rho_a, \rho_h, \rho_n) = (0.2, 0.6, 0.2)$ |                   |               |               |               |               |               |
| P.Lasso                                      | 0.496 (0.071)     | 0.104 (0.035) | 1 (0)         | 1 (0)         | 0.133 (0.002) | 2.868 (0.441) |
| S.Lasso                                      | 0.319 (0.069)     | 0.045 (0.016) | 0.177 (0.162) | 0.016 (0.019) | 0.138 (0.002) | 2.601 (0.63)  |
| CoFu                                         | 0.77 (0.029)      | 0.214 (0.017) | 0.685 (0.099) | 0.16 (0.076)  | 0.122 (0.003) | 0.69 (0.057)  |
| $(\rho_a, \rho_h, \rho_n) = (0.4, 0.1, 0.5)$ |                   |               |               |               |               |               |
| P.Lasso                                      | 0.523 (0.043)     | 0.111 (0.025) | 1 (0)         | 1 (0)         | 0.135 (0.002) | 2.750 (0.251) |
| S.Lasso                                      | 0.279 (0.06)      | 0.039 (0.014) | 0.142 (0.071) | 0.012 (0.026) | 0.146 (0.002) | 2.926 (0.554) |
| CoFu                                         | 0.76 (0.032)      | 0.206 (0.011) | 0.579 (0.069) | 0.104 (0.051) | 0.126 (0.003) | 0.703 (0.039) |
| $(\rho_a, \rho_h, \rho_n) = (0.5, 0.5, 0)$   |                   |               |               |               |               |               |
| P.Lasso                                      | 0.772 (0.03)      | 0.12 (0.019)  | 1 (0)         | 1 (0)         | 0.111 (0.004) | 1.945 (0.203) |
| S.Lasso                                      | 0.316 (0.069)     | 0.047 (0.012) | 0.107 (0.082) | 0.029 (0.051) | 0.142 (0.003) | 2.697 (0.557) |
| CoFu                                         | 0.909 (0.022)     | 0.168 (0.013) | 0.769 (0.08)  | 0.138 (0.057) | 0.1 (0.004)   | 0.669 (0.027) |
| $(\rho_a, \rho_h, \rho_n) = (0.6, 0.2, 0.2)$ |                   |               |               |               |               |               |
| P.Lasso                                      | 0.729 (0.032)     | 0.141 (0.028) | 1 (0)         | 1 (0)         | 0.118 (0.004) | 1.9 (0.294)   |
| S.Lasso                                      | 0.28 (0.11)       | 0.041 (0.027) | 0.158 (0.154) | 0.029 (0.057) | 0.146 (0.003) | 2.879 (1.19)  |
| CoFu                                         | 0.87 (0.02)       | 0.182 (0.009) | 0.797 (0.088) | 0.135 (0.068) | 0.107 (0.004) | 0.655 (0.024) |
| $(\rho_a, \rho_h, \rho_n) = (0.9, 0, 0.1)$   |                   |               |               |               |               |               |
| P.Lasso                                      | 0.915 (0.037)     | 0.132 (0.034) | 1 (0)         | 1 (0)         | 0.105 (0.004) | 1.685 (0.308) |
| S.Lasso                                      | 0.275 (0.077)     | 0.044 (0.02)  | 0.12 (0.098)  | 0.03 (0.048)  | 0.149 (0.002) | 2.996 (0.721) |
| CoFu                                         | 0.925 (0.025)     | 0.161 (0.02)  | 0.925 (0.09)  | 0.05 (0.071)  | 0.095 (0.006) | 0.65 (0.036)  |

**TABLE B6** Simulation under the LR model: summary statistics of results obtained by using V-fold (V=5) CV. Nonzero coefficients are randomly drawn from  $\mathcal{U}[0.2, 1]$ . In each cell, mean(sd).

|                                              | Individual effect |               | Community     |               | ERMSE         | RMSPE         |
|----------------------------------------------|-------------------|---------------|---------------|---------------|---------------|---------------|
|                                              | TPR               | FPR           | TPR           | FPR           |               |               |
| $(\rho_a, \rho_h, \rho_n) = (0.1, 0, 0.9)$   |                   |               |               |               |               |               |
| P.Lasso                                      | 0.232 (0.047)     | 0.08 (0.029)  | 1 (0)         | 1 (0)         | 0.197 (0.001) | 4.875 (0.599) |
| S.Lasso                                      | 0.296 (0.065)     | 0.044 (0.015) | 0.121 (0.089) | 0.011 (0.019) | 0.185 (0.007) | 3.657 (0.55)  |
| CoFu                                         | 0.617 (0.044)     | 0.228 (0.02)  | 0.583 (0.138) | 0.058 (0.021) | 0.174 (0.004) | 0.913 (0.112) |
| $(\rho_a, \rho_h, \rho_n) = (0.1, 0.9, 0)$   |                   |               |               |               |               |               |
| P.Lasso                                      | 0.497 (0.054)     | 0.117 (0.027) | 1 (0)         | 1 (0)         | 0.162 (0.003) | 3.388 (0.4)   |
| S.Lasso                                      | 0.413 (0.061)     | 0.059 (0.015) | 0.057 (0.056) | 0.017 (0.03)  | 0.159 (0.006) | 2.459 (0.673) |
| CoFu                                         | 0.748 (0.033)     | 0.202 (0.011) | 0.642 (0.084) | 0.114 (0.031) | 0.138 (0.003) | 0.766 (0.028) |
| $(\rho_a, \rho_h, \rho_n) = (0.2, 0.6, 0.2)$ |                   |               |               |               |               |               |
| P.Lasso                                      | 0.535 (0.052)     | 0.121 (0.038) | 1 (0)         | 1 (0)         | 0.162 (0.004) | 3.249 (0.436) |
| S.Lasso                                      | 0.353 (0.071)     | 0.051 (0.015) | 0.107 (0.077) | 0.025 (0.021) | 0.173 (0.006) | 2.97 (0.652)  |
| CoFu                                         | 0.759 (0.023)     | 0.205 (0.01)  | 0.629 (0.121) | 0.125 (0.038) | 0.142 (0.006) | 0.771 (0.036) |
| $(\rho_a, \rho_h, \rho_n) = (0.4, 0.1, 0.5)$ |                   |               |               |               |               |               |
| P.Lasso                                      | 0.457 (0.047)     | 0.097 (0.023) | 1 (0)         | 1 (0)         | 0.162 (0.003) | 3.615 (0.401) |
| S.Lasso                                      | 0.374 (0.058)     | 0.062 (0.013) | 0.013 (0.033) | 0.038 (0)     | 0.172 (0.004) | 2.69 (0.679)  |
| CoFu                                         | 0.725 (0.037)     | 0.204 (0.018) | 0.67 (0.096)  | 0.096 (0.042) | 0.143 (0.003) | 0.821 (0.056) |
| $(\rho_a, \rho_h, \rho_n) = (0.5, 0.5, 0)$   |                   |               |               |               |               |               |
| P.Lasso                                      | 0.752 (0.05)      | 0.114 (0.023) | 1 (0)         | 1 (0)         | 0.115 (0.004) | 2.114 (0.264) |
| S.Lasso                                      | 0.427 (0.05)      | 0.064 (0.008) | 0.032 (0.03)  | 0.016 (0.025) | 0.152 (0.007) | 2.234 (0.583) |
| CoFu                                         | 0.848 (0.019)     | 0.139 (0.011) | 0.668 (0.087) | 0.116 (0.054) | 0.097 (0.003) | 0.732 (0.037) |
| $(\rho_a, \rho_h, \rho_n) = (0.6, 0.2, 0.2)$ |                   |               |               |               |               |               |
| P.Lasso                                      | 0.701 (0.038)     | 0.149 (0.028) | 1 (0)         | 1 (0)         | 0.142 (0.005) | 2.748 (0.307) |
| S.Lasso                                      | 0.376 (0.054)     | 0.062 (0.02)  | 0.049 (0.029) | 0.012 (0.025) | 0.178 (0.007) | 2.707 (1.072) |
| CoFu                                         | 0.849 (0.035)     | 0.205 (0.016) | 0.8 (0.087)   | 0.147 (0.064) | 0.126 (0.003) | 0.986 (0.036) |
| $(\rho_a, \rho_h, \rho_n) = (0.9, 0, 0.1)$   |                   |               |               |               |               |               |
| P.Lasso                                      | 0.784 (0.034)     | 0.126 (0.027) | 1 (0)         | 1 (0)         | 0.116 (0.003) | 2.01 (0.267)  |
| S.Lasso                                      | 0.336 (0.092)     | 0.056 (0.02)  | 0.066 (0.085) | 0.02 (0.047)  | 0.181 (0.007) | 3.099 (1.032) |
| CoFu                                         | 0.886 (0.027)     | 0.16 (0.019)  | 0.912 (0.048) | 0.133 (0.126) | 0.098 (0.006) | 0.971 (0.027) |



**TABLE B7** Simulation under the LR model: summary statistics of results obtained by using V-fold (V=5) CV. Nonzero coefficients in dataset 2 are drawn from  $\mathcal{U}[0.4, 0.7]$ , and those specific to datasets 1 and 3 are drawn from  $\mathcal{U}[0.1, 0.3]$  and  $\mathcal{U}[0.8, 1]$ , respectively. In each cell, mean(sd).

|                                              | Individual effect |               | Community     |               | ERMSE         | PRMSE         |
|----------------------------------------------|-------------------|---------------|---------------|---------------|---------------|---------------|
|                                              | TPR               | FPR           | TPR           | FPR           |               |               |
| $(\rho_a, \rho_h, \rho_n) = (0.1, 0, 0.9)$   |                   |               |               |               |               |               |
| P.Lasso                                      | 0.213 (0.083)     | 0.057 (0.04)  | 1 (0)         | 1 (0)         | 0.192 (0.002) | 4.807 (1.013) |
| S.Lasso                                      | 0.253 (0.067)     | 0.025 (0.01)  | 0.207 (0.154) | 0.002 (0.01)  | 0.181 (0.005) | 3.694 (0.723) |
| CoFu                                         | 0.664 (0.044)     | 0.186 (0.027) | 0.597 (0.124) | 0.094 (0.004) | 0.168 (0.005) | 0.997 (0.187) |
| $(\rho_a, \rho_h, \rho_n) = (0.1, 0.9, 0)$   |                   |               |               |               |               |               |
| P.Lasso                                      | 0.462 (0.088)     | 0.101 (0.032) | 1 (0)         | 1 (0)         | 0.155 (0.004) | 3.421 (0.466) |
| S.Lasso                                      | 0.38 (0.075)      | 0.051 (0.014) | 0.114 (0.096) | 0.008 (0.013) | 0.149 (0.003) | 2.471 (0.738) |
| CoFu                                         | 0.759 (0.02)      | 0.191 (0.013) | 0.612 (0.096) | 0.117 (0.041) | 0.132 (0.003) | 0.772 (0.049) |
| $(\rho_a, \rho_h, \rho_n) = (0.2, 0.6, 0.2)$ |                   |               |               |               |               |               |
| P.Lasso                                      | 0.513 (0.05)      | 0.124 (0.025) | 1 (0)         | 1 (0)         | 0.158 (0.003) | 3.22 (0.269)  |
| S.Lasso                                      | 0.363 (0.073)     | 0.055 (0.017) | 0.044 (0.057) | 0.009 (0.015) | 0.158 (0.004) | 2.43 (0.801)  |
| CoFu                                         | 0.743 (0.026)     | 0.2 (0.013)   | 0.63 (0.064)  | 0.113 (0.052) | 0.138 (0.004) | 0.765 (0.026) |
| $(\rho_a, \rho_h, \rho_n) = (0.4, 0.1, 0.5)$ |                   |               |               |               |               |               |
| P.Lasso                                      | 0.547 (0.067)     | 0.11 (0.028)  | 1 (0)         | 1 (0)         | 0.166 (0.004) | 3.604 (0.339) |
| S.Lasso                                      | 0.378 (0.061)     | 0.056 (0.023) | 0.056 (0.044) | 0.004 (0.014) | 0.172 (0.002) | 2.75 (1)      |
| CoFu                                         | 0.836 (0.026)     | 0.189 (0.02)  | 0.632 (0.075) | 0.108 (0.048) | 0.144 (0.003) | 0.844 (0.059) |
| $(\rho_a, \rho_h, \rho_n) = (0.5, 0.5, 0)$   |                   |               |               |               |               |               |
| P.Lasso                                      | 0.793 (0.038)     | 0.132 (0.021) | 1 (0)         | 1 (0)         | 0.124 (0.004) | 2.175 (0.291) |
| S.Lasso                                      | 0.316 (0.05)      | 0.05 (0.015)  | 0.069 (0.066) | 0.017 (0.038) | 0.16 (0.004)  | 2.996 (0.755) |
| CoFu                                         | 0.905 (0.019)     | 0.16 (0.011)  | 0.689 (0.117) | 0.056 (0.026) | 0.106 (0.004) | 0.715 (0.028) |
| $(\rho_a, \rho_h, \rho_n) = (0.6, 0.2, 0.2)$ |                   |               |               |               |               |               |
| P.Lasso                                      | 0.811 (0.04)      | 0.148 (0.042) | 1 (0)         | 1 (0)         | 0.126 (0.005) | 1.971 (0.468) |
| S.Lasso                                      | 0.306 (0.073)     | 0.045 (0.013) | 0.078 (0.061) | 0.021 (0.048) | 0.167 (0.005) | 3.35 (0.793)  |
| CoFu                                         | 0.884 (0.021)     | 0.193 (0.018) | 0.867 (0.05)  | 0.164 (0.117) | 0.112 (0.007) | 0.902 (0.032) |
| $(\rho_a, \rho_h, \rho_n) = (0.9, 0, 0.1)$   |                   |               |               |               |               |               |
| P.Lasso                                      | 0.969 (0.007)     | 0.104 (0.016) | 1 (0)         | 1 (0)         | 0.073 (0.003) | 1.17 (0.107)  |
| S.Lasso                                      | 0.33 (0.048)      | 0.053 (0.013) | 0.067 (0.055) | 0 (0)         | 0.166 (0.004) | 1.985 (0.59)  |
| CoFu                                         | 0.982 (0.005)     | 0.083 (0.025) | 0.998 (0.007) | 0 (0)         | 0.054 (0.005) | 0.801 (0.041) |

**TABLE B8** Simulation under the Logit model: mean(sd) of AUC for effect identification. (a) Nonzero coefficients are equal to 0.5. (b) Nonzero coefficients are drawn from  $\mathcal{U}[0.2, 1]$ . (c) Nonzero coefficients in dataset 2 are drawn from  $\mathcal{U}[0.4, 0.7]$ , and those specific to datasets 1 and 3 are drawn from  $\mathcal{U}[0.1, 0.3]$  and  $\mathcal{U}[0.8, 1]$ , respectively.

|                                              | $r = 100$    |              |              | $r = 150$    |              |              |
|----------------------------------------------|--------------|--------------|--------------|--------------|--------------|--------------|
|                                              | a            | b            | c            | a            | b            | c            |
| $(\rho_a, \rho_h, \rho_n) = (0.1, 0, 0.9)$   |              |              |              |              |              |              |
| P.Lasso                                      | 0.561(0.02)  | 0.613(0.022) | 0.552(0.018) | 0.533(0.016) | 0.582(0.017) | 0.547(0.014) |
| S.Lasso                                      | 0.616(0.08)  | 0.618(0.079) | 0.609(0.051) | 0.541(0.084) | 0.557(0.071) | 0.538(0.074) |
| CoFu                                         | 0.632(0.027) | 0.646(0.026) | 0.623(0.015) | 0.579(0.011) | 0.623(0.028) | 0.594(0.021) |
| $(\rho_a, \rho_h, \rho_n) = (0.1, 0.9, 0)$   |              |              |              |              |              |              |
| P.Lasso                                      | 0.624(0.012) | 0.623(0.023) | 0.619(0.038) | 0.538(0.016) | 0.569(0.021) | 0.579(0.016) |
| S.Lasso                                      | 0.617(0.071) | 0.587(0.08)  | 0.576(0.083) | 0.521(0.076) | 0.584(0.066) | 0.581(0.067) |
| CoFu                                         | 0.658(0.027) | 0.656(0.03)  | 0.652(0.026) | 0.606(0.015) | 0.626(0.029) | 0.636(0.067) |
| $(\rho_a, \rho_h, \rho_n) = (0.2, 0.6, 0.2)$ |              |              |              |              |              |              |
| P.Lasso                                      | 0.621(0.029) | 0.627(0.02)  | 0.622(0.024) | 0.544(0.016) | 0.592(0.023) | 0.587(0.011) |
| S.Lasso                                      | 0.621(0.089) | 0.584(0.089) | 0.579(0.075) | 0.56(0.095)  | 0.569(0.085) | 0.553(0.098) |
| CoFu                                         | 0.648(0.022) | 0.65(0.024)  | 0.646(0.035) | 0.61(0.028)  | 0.616(0.022) | 0.627(0.023) |
| $(\rho_a, \rho_h, \rho_n) = (0.4, 0.1, 0.5)$ |              |              |              |              |              |              |
| P.Lasso                                      | 0.645(0.03)  | 0.648(0.019) | 0.631(0.031) | 0.567(0.023) | 0.595(0.024) | 0.589(0.019) |
| S.Lasso                                      | 0.595(0.086) | 0.591(0.082) | 0.614(0.067) | 0.55(0.09)   | 0.544(0.088) | 0.548(0.066) |
| CoFu                                         | 0.672(0.028) | 0.668(0.014) | 0.652(0.034) | 0.619(0.025) | 0.64(0.021)  | 0.639(0.019) |
| $(\rho_a, \rho_h, \rho_n) = (0.5, 0.5, 0)$   |              |              |              |              |              |              |
| P.Lasso                                      | 0.679(0.042) | 0.687(0.022) | 0.668(0.036) | 0.614(0.028) | 0.611(0.026) | 0.623(0.017) |
| S.Lasso                                      | 0.625(0.081) | 0.635(0.046) | 0.62(0.072)  | 0.57(0.08)   | 0.586(0.084) | 0.568(0.076) |
| CoFu                                         | 0.72(0.025)  | 0.699(0.028) | 0.717(0.031) | 0.668(0.028) | 0.656(0.018) | 0.654(0.032) |
| $(\rho_a, \rho_h, \rho_n) = (0.6, 0.2, 0.2)$ |              |              |              |              |              |              |
| P.Lasso                                      | 0.672(0.022) | 0.689(0.022) | 0.69(0.015)  | 0.62(0.033)  | 0.647(0.027) | 0.642(0.017) |
| S.Lasso                                      | 0.607(0.079) | 0.611(0.083) | 0.592(0.072) | 0.533(0.07)  | 0.544(0.086) | 0.543(0.08)  |
| CoFu                                         | 0.678(0.021) | 0.707(0.022) | 0.707(0.017) | 0.65(0.017)  | 0.676(0.026) | 0.685(0.022) |
| $(\rho_a, \rho_h, \rho_n) = (0.9, 0, 0.1)$   |              |              |              |              |              |              |
| P.Lasso                                      | 0.77(0.016)  | 0.746(0.034) | 0.774(0.022) | 0.69(0.034)  | 0.695(0.03)  | 0.691(0.02)  |
| S.Lasso                                      | 0.603(0.071) | 0.613(0.071) | 0.612(0.087) | 0.563(0.087) | 0.575(0.066) | 0.558(0.072) |
| CoFu                                         | 0.764(0.028) | 0.735(0.034) | 0.778(0.033) | 0.707(0.021) | 0.709(0.015) | 0.703(0.021) |

**TABLE B9** Simulation under the Logit model: mean(sd) of AUC for community differentiation. (a) Nonzero coefficients are equal to 0.5. (b) Nonzero coefficients are drawn from  $\mathcal{U}[0.2, 1]$ . (c) Nonzero coefficients in dataset 2 are drawn from  $\mathcal{U}[0.4, 0.7]$ , and those specific to datasets 1 and 3 are drawn from  $\mathcal{U}[0.1, 0.3]$  and  $\mathcal{U}[0.8, 1]$ , respectively.

|                                              | $r = 100$    |              |              | $r = 150$    |              |              |
|----------------------------------------------|--------------|--------------|--------------|--------------|--------------|--------------|
|                                              | a            | b            | c            | a            | b            | c            |
| $(\rho_a, \rho_h, \rho_n) = (0.1, 0, 0.9)$   |              |              |              |              |              |              |
| S.Lasso                                      | 0.591(0.077) | 0.613(0.083) | 0.537(0.081) | 0.585(0.071) | 0.606(0.108) | 0.545(0.071) |
| CoFu                                         | 0.663(0.067) | 0.659(0.075) | 0.623(0.065) | 0.631(0.067) | 0.687(0.063) | 0.639(0.058) |
| $(\rho_a, \rho_h, \rho_n) = (0.1, 0.9, 0.1)$ |              |              |              |              |              |              |
| S.Lasso                                      | 0.569(0.064) | 0.605(0.09)  | 0.604(0.073) | 0.536(0.097) | 0.576(0.081) | 0.539(0.138) |
| CoFu                                         | 0.639(0.052) | 0.688(0.053) | 0.661(0.056) | 0.59(0.071)  | 0.623(0.07)  | 0.596(0.083) |
| $(\rho_a, \rho_h, \rho_n) = (0.2, 0.6, 0.2)$ |              |              |              |              |              |              |
| S.Lasso                                      | 0.547(0.075) | 0.577(0.08)  | 0.586(0.084) | 0.52(0.078)  | 0.573(0.108) | 0.557(0.06)  |
| CoFu                                         | 0.627(0.073) | 0.633(0.078) | 0.645(0.079) | 0.608(0.08)  | 0.644(0.062) | 0.615(0.068) |
| $(\rho_a, \rho_h, \rho_n) = (0.4, 0.1, 0.5)$ |              |              |              |              |              |              |
| S.Lasso                                      | 0.536(0.08)  | 0.594(0.052) | 0.523(0.134) | 0.529(0.177) | 0.544(0.056) | 0.551(0.085) |
| CoFu                                         | 0.627(0.073) | 0.648(0.049) | 0.619(0.102) | 0.612(0.112) | 0.626(0.064) | 0.628(0.076) |
| $(\rho_a, \rho_h, \rho_n) = (0.5, 0.5, 0)$   |              |              |              |              |              |              |
| S.Lasso                                      | 0.516(0.076) | 0.513(0.079) | 0.512(0.063) | 0.568(0.108) | 0.556(0.054) | 0.541(0.051) |
| CoFu                                         | 0.595(0.048) | 0.614(0.048) | 0.633(0.069) | 0.602(0.086) | 0.6(0.064)   | 0.619(0.062) |
| $(\rho_a, \rho_h, \rho_n) = (0.6, 0.2, 0.2)$ |              |              |              |              |              |              |
| S.Lasso                                      | 0.522(0.076) | 0.558(0.096) | 0.498(0.06)  | 0.537(0.081) | 0.564(0.085) | 0.452(0.081) |
| CoFu                                         | 0.652(0.043) | 0.647(0.057) | 0.685(0.06)  | 0.635(0.062) | 0.644(0.069) | 0.636(0.051) |
| $(\rho_a, \rho_h, \rho_n) = (0.9, 0, 0.1)$   |              |              |              |              |              |              |
| S.Lasso                                      | 0.584(0.114) | 0.596(0.088) | 0.538(0.146) | 0.598(0.168) | 0.577(0.107) | 0.565(0.107) |
| CoFu                                         | 0.71(0.087)  | 0.707(0.042) | 0.699(0.065) | 0.704(0.121) | 0.688(0.056) | 0.676(0.064) |

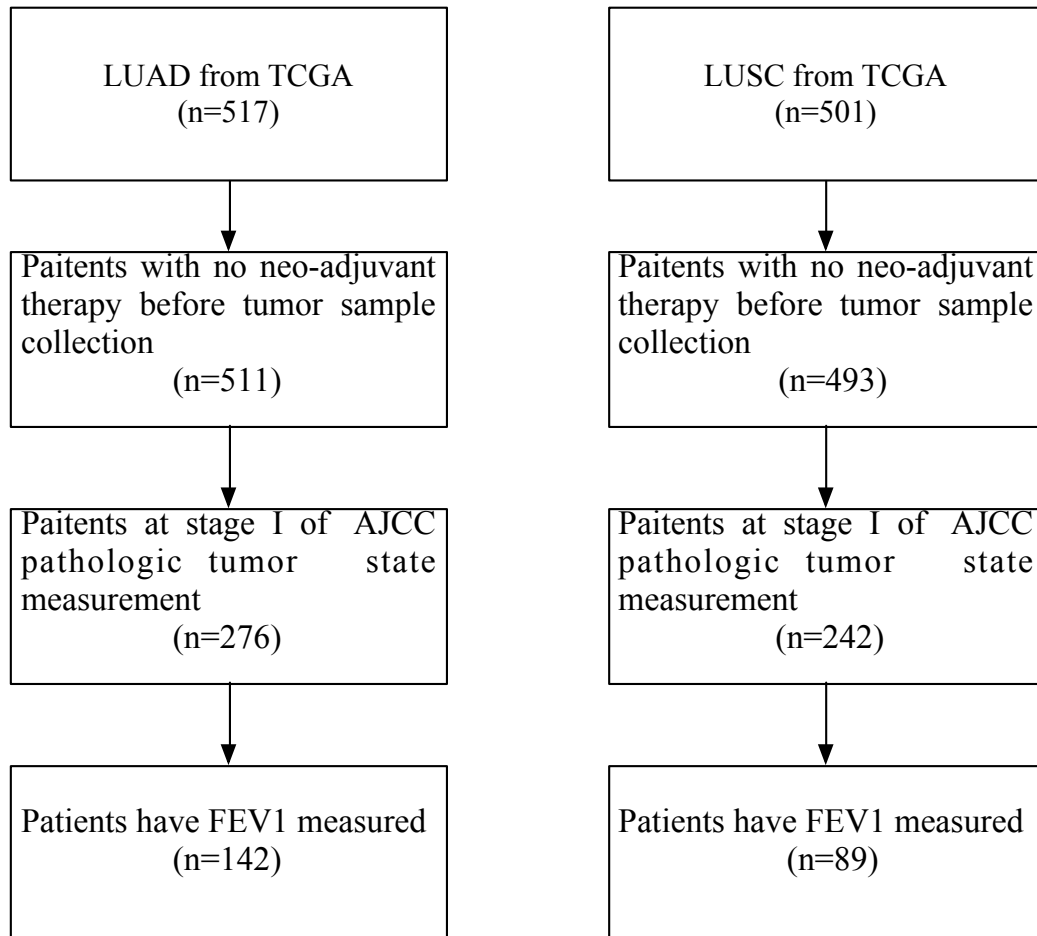

**FIGURE B2** Flowcharts of sample selection for the analysis of lung cancer data (left: LUAD, right: LUSC).

**TABLE B10** Simulation based on the SKCM data: mean(sd) of AUC.

| community                                    |              | individual effect |              |              |
|----------------------------------------------|--------------|-------------------|--------------|--------------|
| S.Lasso                                      | CoFu         | P.Lasso           | S.Lasso      | CoFu         |
| $(\rho_a, \rho_h, \rho_n) = (0.1, 0, 0.9)$   |              |                   |              |              |
| 0.772(0.051)                                 | 0.882(0.032) | 0.576(0.011)      | 0.659(0.012) | 0.673(0.01)  |
| $(\rho_a, \rho_h, \rho_n) = (0.1, 0.9, 0)$   |              |                   |              |              |
| 0.758(0.081)                                 | 0.819(0.035) | 0.625(0.009)      | 0.651(0.016) | 0.706(0.012) |
| $(\rho_a, \rho_h, \rho_n) = (0.2, 0.6, 0.2)$ |              |                   |              |              |
| 0.514(0.062)                                 | 0.631(0.032) | 0.656(0.012)      | 0.655(0.009) | 0.679(0.008) |
| $(\rho_a, \rho_h, \rho_n) = (0.4, 0.1, 0.5)$ |              |                   |              |              |
| 0.6(0.048)                                   | 0.71(0.042)  | 0.686(0.018)      | 0.661(0.014) | 0.723(0.011) |
| $(\rho_a, \rho_h, \rho_n) = (0.5, 0.5, 0)$   |              |                   |              |              |
| 0.563(0.055)                                 | 0.676(0.038) | 0.665(0.009)      | 0.658(0.011) | 0.724(0.006) |
| $(\rho_a, \rho_h, \rho_n) = (0.6, 0.2, 0.2)$ |              |                   |              |              |
| 0.633(0.046)                                 | 0.712(0.043) | 0.706(0.013)      | 0.659(0.008) | 0.704(0.014) |
| $(\rho_a, \rho_h, \rho_n) = (0.9, 0, 0.1)$   |              |                   |              |              |
| 0.566(0.066)                                 | 0.829(0.046) | 0.752(0.015)      | 0.66(0.012)  | 0.749(0.01)  |

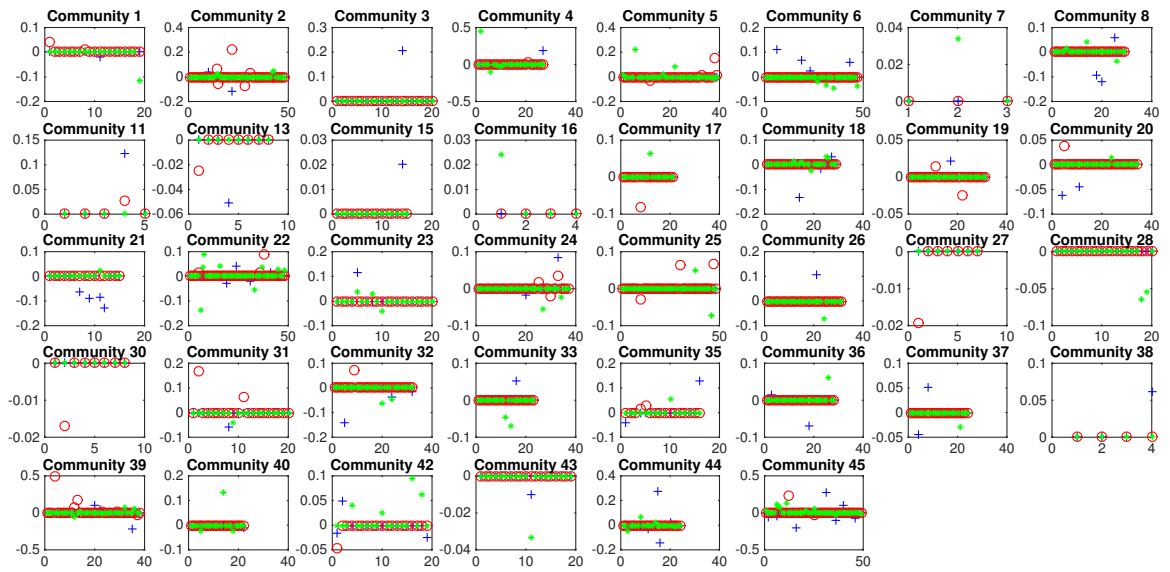

**FIGURE B3** Analysis of the TCGA SKCM data using S.Lasso. Blue crosses correspond to stage I, red circles to stage II, and green filled circles to stages III and IV.

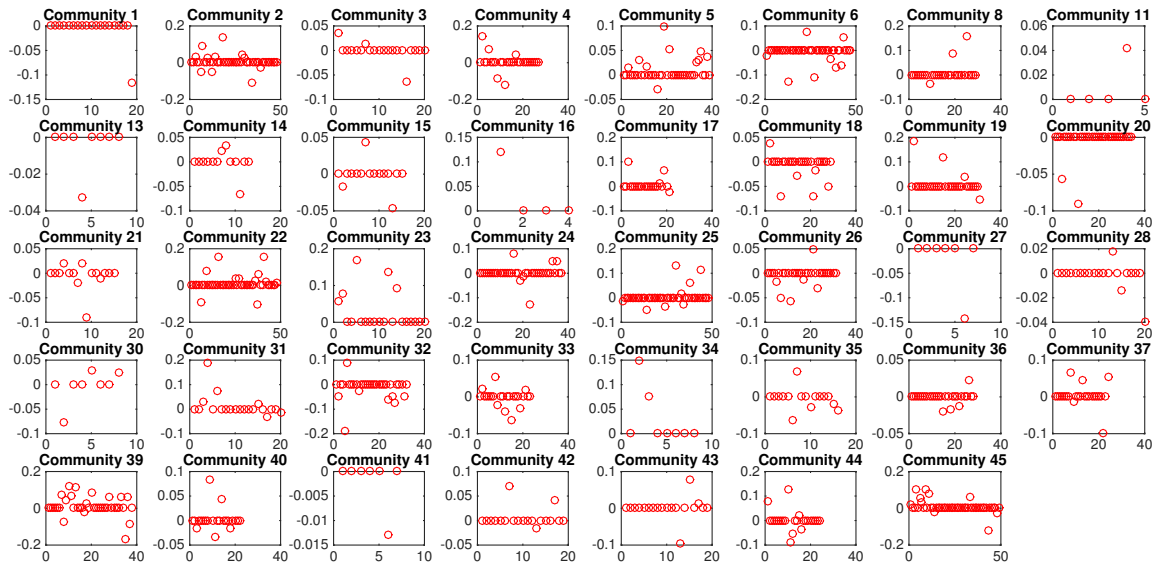

**FIGURE B4** Analysis of the TCGA SKCM data using P.Lasso.

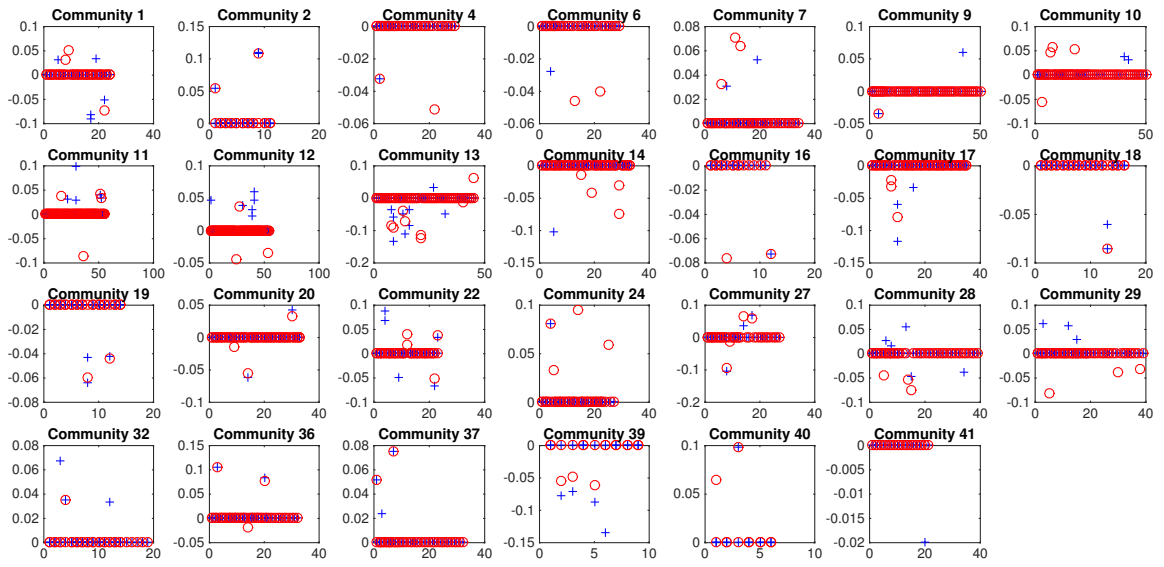

**FIGURE B5** Analysis of the TCGA lung cancer data using S.Lasso. Blue crosses correspond to LUAD and red circles to LUSC.



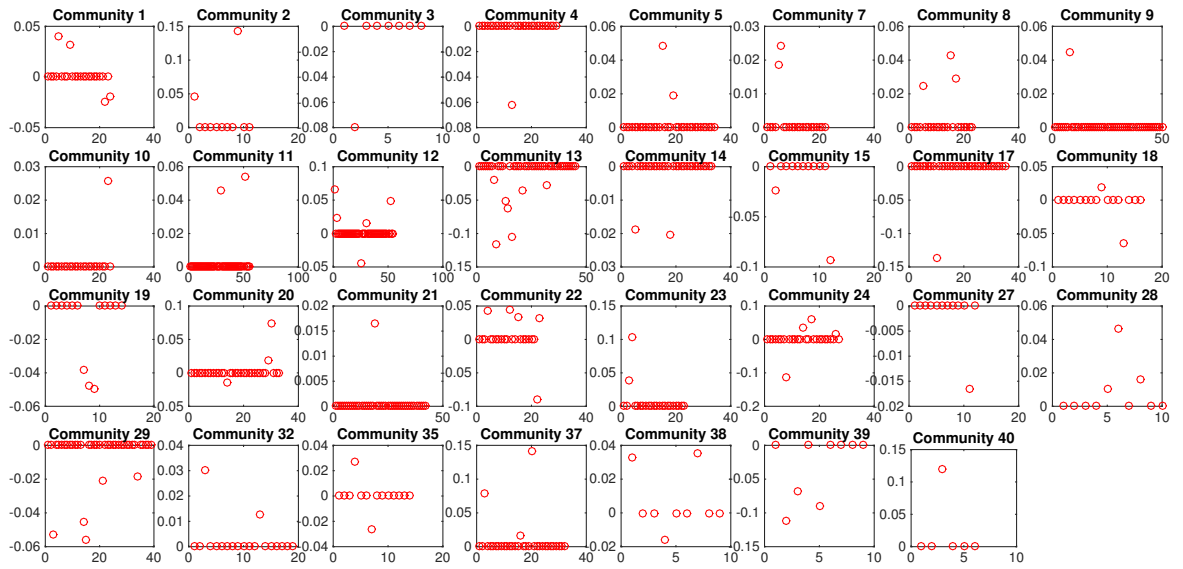

**FIGURE B6** Analysis of the TCGA lung cancer data using P.Lasso.

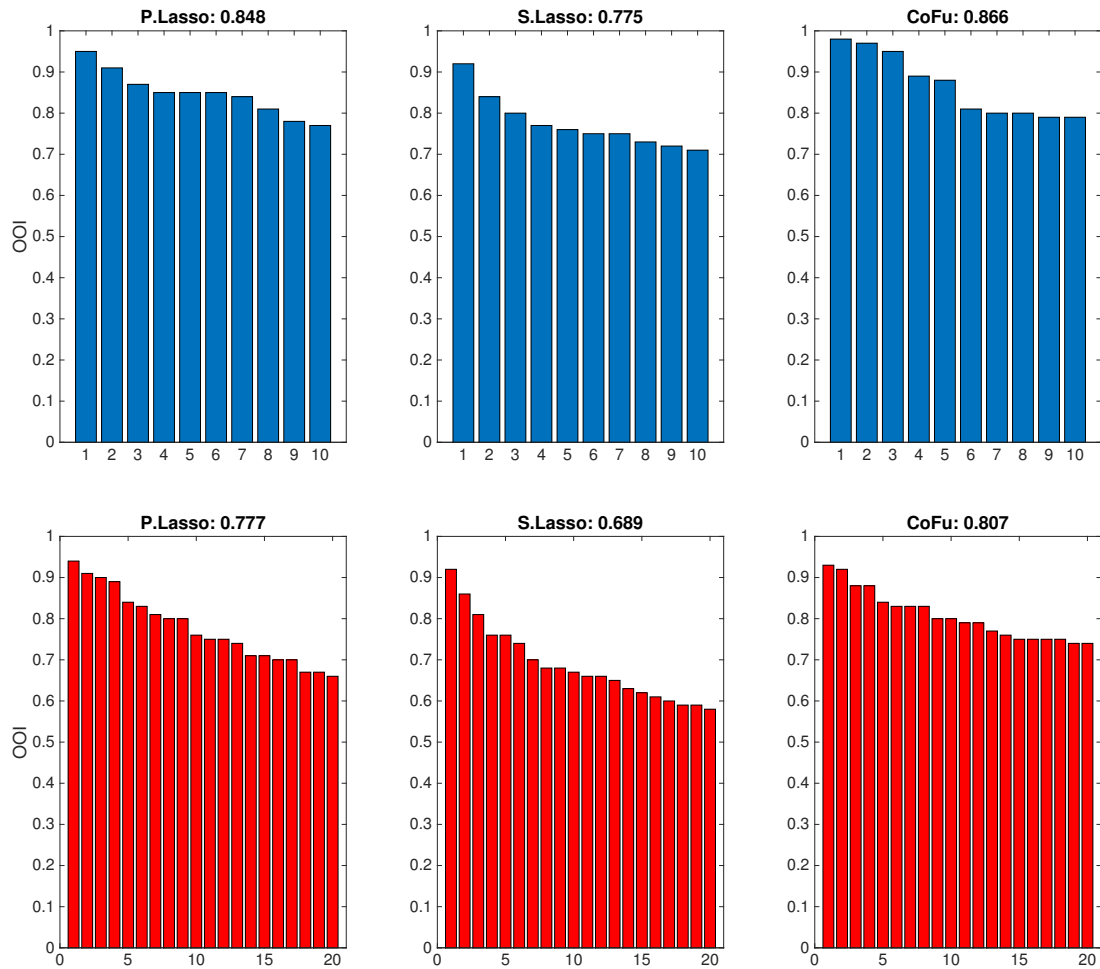

FIGURE B7 OOI in data analysis. Top: SKCM. Bottom: lung cancer data.

## C COMPUTATION OF AUC IN SIMULATION

For the proposed CoFu method, we fit the model under  $20 \times 6 [\lambda_1, \lambda_2]$  values, where  $\lambda_2 \in (0, 0.001, 0.01, 0.1, 1, 10)$ . Let  $\lambda_1^{\max}$  be the minimal  $\lambda_1$  such that all regression coefficients shrink to zero. We generate a sequence of  $\lambda_1$  with length 20 that are equally-spaced in logarithm from  $0.001\lambda_1^{\max}$  to  $\lambda_1^{\max}$ . We calculate the TPR and FPR for each  $[\lambda_1, \lambda_2]$ , and extract the envelope, which is the ROC curve. From this, we obtain the AUC. For the two alternatives, the calculation of the ROC and AUC can be conducted in a similar manner.

## D EXAMINATION OF CENSORING IN THE ANALYSIS OF LUNG CANCER DATA

We take a closer look at the vital status in the analysis of the lung cancer data. The contingency table is shown below. For the LUAD data, stage I has a higher percentage of censoring, whereas for the LUSC data, there is no significant association between vital status and stage. In our analysis, we focus on the continuous FEV1 variable, which is not subject to censoring. All subjects with FEV1 measurements are used in analysis, regardless of their vital status. Censoring is expected to play a more direct role in the analysis of prognosis.

**TABLE D11** Contingency table for LUAD and LUSC

|          | LUAD    |          |           | LUSC    |          |           |
|----------|---------|----------|-----------|---------|----------|-----------|
|          | Stage I | Stage II | Stage III | Stage I | Stage II | Stage III |
| Deceased | 68      | 53       | 61        | 99      | 63       | 48        |
| Alive    | 208     | 68       | 45        | 143     | 94       | 42        |
